# Supplementary material for: Novel Insights into the Influence of Soil Microstructure Characteristics on the Migration and Residue of Light Non-Aqueous Phase Liquid
Source: MDPI journal article supplement (doi:10.3390/toxics11010016), 2022-12-24
Supplement: s1 [file s1]

# **Supplementary Materials: Novel Insights into the Influence of Soil Microstructure Characteristics on the Migration and Residue of Light Non-Aqueous Phase Liquid**

Xiaodong Li, Qian Zhang, Xueli Zhang, Jialun Shen, Zongquan Sun, Fujun Ma, Bin Wu and

Qingbao Gu

**Table S1.** Correlation analysis between parameters of soil particle size distribution

|                   | Diameter distance | Consistency | SSA    | D[3,2] | D[4,3] | Dv10  | Dv30  | Dv50  | Dv60  | Dv90  | Cc    | Cu |
|-------------------|-------------------|-------------|--------|--------|--------|-------|-------|-------|-------|-------|-------|----|
| Diameter distance | 1                 | **          |        |        |        |       |       |       |       |       |       |    |
| Consistency       | 0.908             | 1           |        |        |        |       |       |       |       |       |       |    |
| SSA               | 0.28              | 0.347       | 1      | **     | *      | **    | *     | *     | *     | *     | **    | *  |
| D[3,2]            | −0.335            | −0.429      | −0.829 | 1      | **     | **    | **    | **    | **    | **    | **    | ** |
| D[4,3]            | −0.173            | −0.258      | −0.658 | 0.954  | 1      | **    | **    | **    | **    | **    | **    | ** |
| Dv10              | −0.313            | −0.402      | −0.719 | 0.982  | 0.985  | 1     | **    | **    | **    | **    | **    | ** |
| Dv30              | −0.276            | −0.367      | −0.622 | 0.949  | 0.989  | 0.99  | 1     | **    | **    | **    | **    | ** |
| Dv50              | −0.283            | −0.377      | −0.643 | 0.958  | 0.99   | 0.993 | 0.999 | 1     | **    | **    | **    | ** |
| Dv60              | −0.281            | −0.376      | −0.653 | 0.962  | 0.991  | 0.994 | 0.998 | 0.999 | 1     | **    | **    | ** |
| Dv90              | −0.043            | −0.164      | −0.648 | 0.93   | 0.989  | 0.959 | 0.966 | 0.967 | 0.969 | 1     | **    | ** |
| Cc                | −0.28             | −0.396      | −0.808 | 0.964  | 0.912  | 0.927 | 0.897 | 0.913 | 0.92  | 0.902 | 1     | ** |
| Cu                | −0.311            | −0.41       | −0.648 | 0.943  | 0.952  | 0.965 | 0.97  | 0.968 | 0.963 | 0.924 | 0.894 | 1  |

Note: Pearson correlation; \* significant at 0.05 level; \*\* significant at 0.01 level.

**Table S2.** Multicollinearity diagnostic between soil particle size distribution parameters

| Model dimension | Characteristic value | Conditional number | Variance ratio |                |                |                |                |                |                 |                 |                 |
|-----------------|----------------------|--------------------|----------------|----------------|----------------|----------------|----------------|----------------|-----------------|-----------------|-----------------|
|                 |                      |                    | Z <sub>1</sub> | Z <sub>2</sub> | Z <sub>3</sub> | Z <sub>7</sub> | Z <sub>8</sub> | Z <sub>9</sub> | Z <sub>10</sub> | Z <sub>11</sub> | Z <sub>12</sub> |
| 1               | 7.414                | 1.00               | -              | -              | -              | -              | 0.0001         | 0.0004         | -               | -               | -               |
| 2               | 2.153                | 1.86               | -              | -              | 0.0001         | -              | -              | 0.0007         | 0.0001          | 0.0001          | 0.0002          |
| 3               | 0.290                | 5.05               | 0.0001         | -              | -              | 0.0001         | 0.0013         | 0.0019         | 0.0007          | 0.0013          | 0.0010          |
| 4               | 0.080                | 9.60               | -              | 0.0001         | 0.0007         | 0.0005         | 0.0251         | 0.0115         | 0.0073          | 0.0001          | -               |
| 5               | 0.030                | 15.73              | 0.0001         | 0.0003         | 0.0026         | -              | 0.0039         | 0.6213         | 0.0013          | 0.0023          | 0.0006          |
| 6               | 0.024                | 17.72              | 0.0003         | 0.0003         | 0.0001         | 0.0002         | 0.0199         | 0.0254         | 0.0024          | 0.0126          | 0.0515          |
| 7               | 0.008                | 29.77              | 0.0001         | -              | 0.0001         | 0.0085         | 0.3913         | 0.0490         | 0.0048          | 0.0033          | 0.0157          |
| 8               | 0.001                | 107.25             | 0.0158         | 0.0705         | 0.8324         | 0.0079         | 0.0011         | 0.0378         | 0.0637          | 0.0141          | 0.0698          |
| 9               | -                    | 192.06             | 0.2244         | 0.0208         | 0.1213         | 0.3716         | 0.0023         | 0.2517         | 0.2322          | 0.2412          | 0.0074          |
| 10              | -                    | 341.74             | 0.7593         | 0.9080         | 0.0428         | .6112          | 0.5548         | 0.0003         | 0.6874          | 0.7250          | 0.8537          |
|                 | VIF                  |                    | 3996.6         | 4145.5         | 838.8          | 832.2          | 33.2           | 21.4           | 78.9            | 251.9           | 87.1            |

Note: “-” less than 0.0001.

**Table S3.** Eigenvalues and proportion of factor analysis

|     | Initial Characteristic Root |                             |                           | Rotation Characteristic Root |                             |                           |
|-----|-----------------------------|-----------------------------|---------------------------|------------------------------|-----------------------------|---------------------------|
|     | Characteristic Root         | Contribution of Variances/% | Cumulative Contribution/% | Characteristic Root          | Contribution of Variances/% | Cumulative Contribution/% |
| Z1  | 9.451                       | 78.757                      | 78.757                    | 8.987                        | 74.893                      | 74.893                    |
| Z2  | 1.750                       | 14.580                      | 93.337                    | 2.213                        | 18.445                      | 93.337                    |
| Z3  | 0.577                       | 4.811                       | 98.149                    |                              |                             |                           |
| Z4  | 0.101                       | 0.842                       | 98.991                    |                              |                             |                           |
| Z5  | 0.065                       | 0.545                       | 99.535                    |                              |                             |                           |
| Z6  | 0.052                       | 0.432                       | 99.967                    |                              |                             |                           |
| Z7  | 0.003                       | 0.022                       | 99.989                    |                              |                             |                           |
| Z8  | 0.001                       | 0.009                       | 99.998                    |                              |                             |                           |
| Z9  | 0                           | 0.001                       | 100                       |                              |                             |                           |
| Z10 | 0                           | 0                           | 100                       |                              |                             |                           |
| Z11 | 0                           | 0                           | 100                       |                              |                             |                           |
| Z12 | 0                           | 0                           | 100                       |                              |                             |                           |

**Table S4.** Volume percentage of different soil pore tested by mercury intrusion

| Classification<br>(location)   | porosimetry          |                        |                         |                       |                            |                         |
|--------------------------------|----------------------|------------------------|-------------------------|-----------------------|----------------------------|-------------------------|
|                                | >75<br>$\mu\text{m}$ | 30–75<br>$\mu\text{m}$ | 7.5–30<br>$\mu\text{m}$ | 0.5–7.5 $\mu\text{m}$ | 0.05–<br>0.5 $\mu\text{m}$ | < 0.05<br>$\mu\text{m}$ |
| Gray dese soil<br>(Qinghai)    | 4.06                 | 1.79                   | 21.88                   | 42.16                 | 17.62                      | 12.49                   |
| Yellow soil (Guizhou)          | 4.32                 | 4.42                   | 22.17                   | 34.89                 | 22.63                      | 11.57                   |
| Loessal soil (Shaanxi)         | 4.11                 | 1.39                   | 69.20                   | 12.85                 | 5.69                       | 6.77                    |
| Fluvo-aquic soil<br>(Hebei)    | 3.32                 | 4.62                   | 57.81                   | 16.69                 | 9.59                       | 7.96                    |
| Red earth (Jiangxi)            | 4.86                 | 4.11                   | 37.34                   | 13.33                 | 11.84                      | 28.50                   |
| Paddy soil (Zhejiang)          | 3.27                 | 0.80                   | 5.89                    | 63.98                 | 17.36                      | 8.70                    |
| Purple soil<br>(Chongqing)     | 4.66                 | 6.35                   | 41.10                   | 22.61                 | 16.53                      | 8.76                    |
| Black soil (Jilin)             | 4.14                 | 15.80                  | 53.98                   | 11.07                 | 6.65                       | 8.36                    |
| Black soil<br>(Heilongjiang)   | 3.72                 | 5.31                   | 47.74                   | 25.26                 | 8.72                       | 9.26                    |
| Red earth (Hunan)              | 5.11                 | 6.90                   | 22.06                   | 27.27                 | 15.56                      | 23.10                   |
| Fluvo-aquic soil<br>(Henan)    | 6.63                 | 3.27                   | 64.33                   | 14.74                 | 5.68                       | 5.35                    |
| Fluvo-aquic soil<br>(Shandong) | 3.52                 | 5.49                   | 70.62                   | 11.62                 | 4.47                       | 4.27                    |
| Sandy soil (Hainan)            | 6.02                 | 21.29                  | 57.79                   | 4.42                  | 3.35                       | 7.14                    |
| Paddy soil (Jiangsu)           | 5.10                 | 5.41                   | 23.28                   | 30.07                 | 26.53                      | 9.61                    |

**Table S5.** Volume of different soil pore tested by mercury intrusion porosimetry

| <b>Classification<br/>(location)</b> | <b>&gt;75<br/>μm</b> | <b>30–75<br/>μm</b> | <b>7.5–30<br/>μm</b> | <b>0.5–7.5<br/>μm</b> | <b>0.05–0.5<br/>μm</b> | <b>&lt;0.05<br/>μm</b> |
|--------------------------------------|----------------------|---------------------|----------------------|-----------------------|------------------------|------------------------|
| Gray dese soil<br>(Qinghai)          | 0.0093               | 0.0041              | 0.05                 | 0.0965                | 0.0403                 | 0.0285                 |
| Yellow soil (Guizhou)                | 0.0118               | 0.0122              | 0.0608               | 0.0956                | 0.0621                 | 0.0317                 |
| Loessal soil (Shaanxi)               | 0.0095               | 0.0032              | 0.1597               | 0.0296                | 0.0131                 | 0.0156                 |
| Fluvo-aquic soil<br>(Hebei)          | 0.008                | 0.0111              | 0.1387               | 0.0401                | 0.023                  | 0.0192                 |
| Red earth (Jiangxi)                  | 0.0089               | 0.0075              | 0.0664               | 0.0259                | 0.0216                 | 0.052                  |
| Paddy soil (Zhejiang)                | 0.0082               | 0.002               | 0.0149               | 0.161                 | 0.0437                 | 0.0219                 |
| Purple soil<br>(Chongqing)           | 0.0106               | 0.0145              | 0.0936               | 0.0515                | 0.0376                 | 0.0199                 |
| Black soil (Jilin)                   | 0.0106               | 0.0407              | 0.1388               | 0.0284                | 0.0171                 | 0.0215                 |
| Black soil<br>(Heilongjiang)         | 0.0087               | 0.0124              | 0.1116               | 0.0591                | 0.0203                 | 0.0217                 |
| Red earth (Hunan)                    | 0.0102               | 0.0138              | 0.044                | 0.0545                | 0.031                  | 0.0462                 |
| Fluvo-aquic soil<br>(Henan)          | 0.0153               | 0.0075              | 0.1482               | 0.0340                | 0.0131                 | 0.0123                 |
| Fluvo-aquic soil<br>(Shandong)       | 0.0086               | 0.0134              | 0.1725               | 0.0284                | 0.0109                 | 0.0104                 |
| Sandy soil (Hainan)                  | 0.0102               | 0.0360              | 0.0978               | 0.0075                | 0.0057                 | 0.0121                 |
| Paddy soil (Jiangsu)                 | 0.0129               | 0.0136              | 0.0588               | 0.076                 | 0.067                  | 0.0243                 |

**Table S6.** Fitted results of diesel transport kinetics by third-order exponential function

| Soil types                  | Third-order exponential equation                                   | $R^2$  | Migration distance/cm |
|-----------------------------|--------------------------------------------------------------------|--------|-----------------------|
| Gray desert soil (Qinghai)  | $y=4.26-1.14e^{(-t/1.929)}-1.50e^{(-t/45.59)}-1.60e^{(-t/0.020)}$  | 0.9986 | 4.26                  |
| Yellow soil (Guizhou)       | $y=3.46-0.77e^{(-t/0.993)}-1.27e^{(-t/24.87)}-1.41e^{(-t/0.014)}$  | 0.9984 | 3.46                  |
| Loessal soil (Shaanxi)      | $y=5.76-1.51e^{(-t/1.078)}-2.82e^{(-t/23.02)}-1.42e^{(-t/0.016)}$  | 0.9961 | 5.76                  |
| Fluvo-aquic soil (Hebei)    | $y=5.16-1.86e^{(-t/20.29)}-1.14e^{(-t/1.315)}-2.14e^{(-t/0.014)}$  | 0.9983 | 5.16                  |
| Red earth (Jiangxi)         | $y=4.42-1.85e^{(-t/0.018)}-0.77e^{(-t/1.227)}-1.78e^{(-t/32.80)}$  | 0.9984 | 4.42                  |
| Paddy soil (Zhejiang)       | $y=3.98-1.34e^{(-t/0.024)}-0.85e^{(-t/0.891)}-1.76e^{(-t/30.451)}$ | 0.9984 | 3.98                  |
| Purple soil (Chongqing)     | $y=4.57-2.02e^{(-t/0.027)}-0.94e^{(-t/1.238)}-1.57e^{(-t/40.549)}$ | 0.9978 | 4.57                  |
| Black soil (Jilin)          | $y=5.94-2.06e^{(-t/0.331)}-2.42e^{(-t/16.67)}-1.45e^{(-t/0.017)}$  | 0.9962 | 5.94                  |
| Black soil (Heilongjiang)   | $y=5.49-1.41e^{(-t/1.364)}-2.35e^{(-t/0.022)}-1.70e^{(-t/31.67)}$  | 0.9984 | 5.49                  |
| Red earth (Hunan)           | $y=4.23-0.94e^{(-t/1.629)}-1.47e^{(-t/39.47)}-1.81e^{(-t/0.024)}$  | 0.9991 | 4.23                  |
| Fluvo-aquic soil (Henan)    | $y=6.52-1.53e^{(-t/1.262)}-3.22e^{(-t/30.34)}-1.74e^{(-t/0.017)}$  | 0.9974 | 6.52                  |
| Fluvo-aquic soil (Shandong) | $y=6.43-1.83e^{(-t/37.14)}-2.29e^{(-t/2.622)}-2.26e^{(-t/0.061)}$  | 0.9988 | 6.43                  |
| Sandy soil (Hainan)         | $y=8.82-2.66e^{(-t/1.24)}-2.52e^{(-t/0.017)}-3.62e^{(-t/36.093)}$  | 0.9989 | 8.82                  |
| Paddy soil (Jiangsu)        | $y=3.77-1.53e^{(-t/0.031)}-1.01e^{(-t/1.504)}-1.21e^{(-t/23.663)}$ | 0.9991 | 3.77                  |

**Table S7.** Correlation analysis between parameters of soil particle size distribution, residual concentration and migration depth

| Characteristic parameters | Independent variable | Y <sub>1</sub> (0–1 cm) | Y <sub>2</sub> (1–2 cm) | Y <sub>3</sub> (2–3 cm) | S        |
|---------------------------|----------------------|-------------------------|-------------------------|-------------------------|----------|
| Dv90                      | Z <sub>1</sub>       | –0.627*                 | –0.684**                | –0.633*                 | 0.717**  |
| D[4,3]                    | Z <sub>2</sub>       | –0.666**                | –0.694**                | –0.630*                 | 0.743**  |
| Dv60                      | Z <sub>3</sub>       | –0.723**                | –0.717**                | –0.642*                 | 0.785**  |
| Dv10                      | Z <sub>4</sub>       | –0.726**                | –0.736**                | –0.670**                | 0.798**  |
| Dv50                      | Z <sub>5</sub>       | –0.718**                | –0.717**                | –0.646*                 | 0.776**  |
| Dv30                      | Z <sub>6</sub>       | –0.702**                | –0.705**                | –0.635*                 | 0.758**  |
| D[3,2]                    | Z <sub>7</sub>       | –0.739**                | –0.766**                | –0.725**                | 0.838**  |
| Cu                        | Z <sub>8</sub>       | –0.746**                | –0.748**                | –0.721**                | 0.859**  |
| Cc                        | Z <sub>9</sub>       | –0.646*                 | –0.691**                | –0.693**                | 0.730**  |
| SSA                       | Z <sub>10</sub>      | 0.627*                  | 0.721**                 | 0.725**                 | –0.763** |
| Diameter distance         | Z <sub>11</sub>      | 0.525                   | 0.321                   | 0.254                   | –0.438   |
| Consistency               | Z <sub>12</sub>      | 0.647*                  | 0.487                   | 0.456                   | –0.542*  |

\* significant at 0.05 level; \*\* significant at 0.01 level.



**Table S8.** Principal component regression coefficients and constants

| Characteristic parameters | S       | Y <sub>1</sub> | Y <sub>2</sub> | Y <sub>3</sub> |
|---------------------------|---------|----------------|----------------|----------------|
| Dv90                      | 0.0685  | −0.0241        | −0.1415        | −0.1339        |
| D[4,3]                    | 0.0906  | −0.0546        | −0.1282        | −0.1213        |
| Dv60                      | 0.1119  | −0.0850        | −0.1127        | −0.1067        |
| Dv10                      | 0.1188  | −0.0946        | −0.1084        | −0.1026        |
| Dv50                      | 0.1119  | −0.0852        | −0.1122        | −0.1063        |
| Dv30                      | 0.1098  | −0.0825        | −0.1131        | −0.1070        |
| D[3,2]                    | 0.1253  | −0.1046        | −0.1018        | −0.0964        |
| Cc                        | 0.1175  | −0.0949        | −0.1037        | −0.0982        |
| Cu                        | 0.1166  | −0.0941        | −0.1031        | −0.0976        |
| SSA                       | −0.1062 | 0.0961         | 0.0671         | 0.0636         |
| Diameter distance         | −0.1957 | 0.2614         | −0.0952        | −0.0901        |
| Consistency               | −0.2004 | 0.2615         | −0.0788        | −0.0746        |
| Constants                 | 5.2010  | 5.9620         | 6.3550         | 5.9010         |
